# Supplementary material
Source: PubMed Central journal article supplement (PMC3660990)
Supplement: NIHMS404088-supplement-Supplemental_T1.pdf [file NIHMS404088-supplement-Supplemental_T1.pdf]

**Supplement Table 1.** Composition of the multi-mineral algae product.

| Element    | µg/g    | Element      | µg/g   | Element   | µg/g  |
|------------|---------|--------------|--------|-----------|-------|
| Aluminum   | 291     | Hafnium      | <0.03  | Rubidium  | 1.95  |
| Antimony   | 6.74    | Holmium      | <0.05  | Ruthenium | 0.088 |
| Arsenic    | <0.2    | Indium       | 0.052  | Samarium  | 0.529 |
| Barium     | 64.2    | Iodine       | 32.8   | Scandium  | 0.041 |
| Beryllium  | 0.306   | Iridium      | <0.05  | Selenium  | 0.672 |
| Bismuth    | 0.081   | Iron         | 915    | Silicon   | 504   |
| Boron      | 39.5    | Lanthanum    | 0.372  | Silver    | 0.250 |
| Bromine    | 10.1    | Lead         | 0.158  | Sodium    | 4,150 |
| Cadmium    | 0.070   | Lithium      | 2.77   | Strontium | 1,810 |
| Calcium    | 351,500 | Lutetium     | 0.065  | Sulfur    | 5,700 |
| Carbon     | 122,000 | Magnesium    | 25,800 | Tantalum  | 0.060 |
| Cerium     | 2.17    | Manganese    | 57.5   | Tellurium | 0.048 |
| Cesium     | 0.096   | Mercury      | 0.008  | Terbium   | 0.030 |
| Chloride   | 910     | Molybdenum   | 0.052  | Thallium  | 0.088 |
| Chromium   | 0.820   | Neodymium    | 0.034  | Thorium   | <0.02 |
| Cobalt     | 0.082   | Nickel       | 1.48   | Thulium   | 0.061 |
| Copper     | 4.89    | Niobium      | 0.142  | Tin       | 0.197 |
| Dysprosium | 0.078   | Osmium       | <0.05  | Titanium  | 27.8  |
| Erbium     | 4.27    | Palladium    | <0.01  | Tungsten  | 0.188 |
| Europium   | 0.051   | Phosphorous  | 310    | Vanadium  | 37.5  |
| Fluoride   | 7.28    | Platinum     | <0.01  | Ytterbium | 0.096 |
| Gadolinium | 0.109   | Potassium    | 5,176  | Yttrium   | 1.22  |
| Gallium    | 2.48    | Praseodymium | 0.228  | Zinc      | 15.8  |
| Germanium  | 0.207   | Rhenium      | <0.05  | Zirconium | 0.339 |
| Gold       | <0.01   | Rhodium      | <0.01  |           |       |

Source: 2008 Test Certificate for Aquamin®, by Advanced Laboratories, Inc. (Salt Lake City), for client Marigot Limited (Ireland).
