# Supplementary material
Source: PubMed Central journal article supplement (PMC3660990)
Supplement: NIHMS404088-supplement-Supplemetal_T2.pdf [file NIHMS404088-supplement-Supplemetal_T2.pdf]

**Supplement Table 2. Composition of the four diets.**

|              | AIN76A |       | AIN76A +<br>mineral supplement |       | HFWD |       | HFWD +<br>mineral supplement |       |
|--------------|--------|-------|--------------------------------|-------|------|-------|------------------------------|-------|
|              | gm%    | kcal% | gm%                            | kcal% | gm%  | kcal% | gm%                          | kcal% |
| Protein      | 20.3   | 20.8  | 19.1                           | 20.8  | 24.4 | 20.5  | 22.9                         | 20.5  |
| Carbohydrate | 66     | 67.7  | 66                             | 67.7  | 48.5 | 41.8  | 45.7                         | 41.8  |
| Fat          | 5      | 11.5  | 5                              | 11.5  | 20   | 37.8  | 18.8                         | 37.8  |
| Total        | 91.3   | 100   | 86                             | 100   | 92.9 | 100   | 87.5                         | 100   |
| kcal/gm      | 3.9    |       | 3.67                           |       | 4.76 |       | 4.49                         |       |

  

| INGREDIENTS                                             | gm             | kcal        | gm             | kcal        | gm             | kcal        | gm             | kcal        |
|---------------------------------------------------------|----------------|-------------|----------------|-------------|----------------|-------------|----------------|-------------|
| Casein (80 Mesh)                                        | 200            | 800         | 200            | 800         | 240            | 960         | 240            | 960         |
| DL-Methionine                                           | 3              | 12          | 3              | 12          | 0              | 0           | 0              | 0           |
| L-Cystine                                               | 0              | 0           | 0              | 0           | 3.6            | 14          | 3.6            | 14          |
| Corn starch                                             | 150            | 600         | 150            | 600         | 100            | 400         | 100            | 400         |
| Maltodextrin 10                                         | 0              | 0           | 0              | 0           | 75             | 300         | 75             | 300         |
| Sucrose                                                 | 500            | 2000        | 500            | 2000        | 310.418        | 1242        | 310.418        | 1242        |
| Cellulose (BW200)                                       | 50             | 0           | 50             | 0           | 20             | 0           | 20             | 0           |
| Corn oil                                                | 50             | 450         | 50             | 450         | 200            | 1800        | 200            | 1800        |
| Ethoxyquin                                              | 0.01           | 0           | 0.01           | 0           | 0.01           | 0           | 0.01           | 0           |
| Mineral Mix for AIN76A <sup>a</sup>                     | 35             | 0           | 35             | 0           | 0              | 0           | 0              | 0           |
| AIN76 Salt Mix (without Calcium Phosphate) <sup>b</sup> | 0              | 0           | 0              | 0           | 21             | 0           | 21             | 0           |
| Monosodium phosphate                                    | 0              | 0           | 0              | 0           | 7.98           | 0           | 7.98           | 0           |
| Monopotassium phosphate                                 | 0              | 0           | 0              | 0           | 7.91           | 0           | 7.91           | 0           |
| Calcium carbonate (40% calcium)                         | 0              | 0           | 0              | 0           | 0.88           | 0           | 0.88           | 0           |
| Mineral supplement (12% calcium)                        | 0              | 0           | 62             | 0           | 0              | 0           | 62             | 0           |
| Vitamin Mix for AIN76A                                  | 10             | 40          | 10             | 40          | 0              | 0           | 0              | 0           |
| AIN76A Vitamin Mix (without Vitamin D3 or Folic Acid)   | 0              | 0           | 0              | 0           | 12             | 48          | 12             | 48          |
| Choline bitartrate                                      | 2              | 0           | 2              | 0           | 1.2            | 0           | 1.2            | 0           |
| Folic acid                                              | 0              | 0           | 0              | 0           | 0.00023        | 0           | 0.00023        | 0           |
| Vitamin D3 (100,000 IU/g)                               | 0              | 0           | 0              | 0           | 0.0012         | 0           | 0.0012         | 0           |
| <b>TOTAL</b>                                            | <b>1000.01</b> | <b>3902</b> | <b>1062.06</b> | <b>3902</b> | <b>1000.05</b> | <b>4764</b> | <b>1062.05</b> | <b>4764</b> |

<sup>a</sup> Amount of essential minerals in mineral mix for low fat diets with/without multi-mineral supplement: calcium phosphate dibasic 5.2 gm/kg (29.5%Ca, 22.8% P), magnesium oxide 0.5 gm/kg (60.3% Mg), chromium potassium sulfate 2 mg/kg (10.4% Cr), cupric carbonate 6 mg/kg (57.5% Cu), ferric citrate 45 mg/kg (21.2% Fe), manganous carbonate 59 mg/kg (47.8% Mn), sodium selenite 0.16 mg/kg (45.7%), zinc carbonate 29 mg/kg (52.1% Zn).

<sup>b</sup> Amount of essential minerals in mineral mix for Western-style diets with/without multi-mineral supplement: magnesium oxide 0.5 gm/kg (60.3% Mg), chromium potassium sulfate 2 mg/kg (10.4% Cr), cupric carbonate 6 mg/kg (57.5% Cu), ferric citrate 45 mg/kg (21.2% Fe), manganous carbonate 59 mg/kg (47.8% Mn), sodium selenite 0.16 mg/kg (45.7%), zinc carbonate 29 mg/kg (52.1% Zn).
